# Supplementary material for: Reliability and Validity of the Upper Limb Physician's Rating Scale in Children with Cerebral Palsy
Source: PubMed Central journal article supplement — Yonsei Med J. 2014 Dec 10;56(1):271–6. doi: 10.3349/ymj.2015.56.1.271 (PMC4276766; doi:10.3349/ymj.2015.56.1.271), 2014-12-10
Supplement: ymj-56-271-s001.pdf [file ymj-56-271-s001.pdf]

**Supplementary Table 1. Upper Limb Physician's Rating Scale**

| Parameters                                                                                                              | Definitions                                   |   |    |
|-------------------------------------------------------------------------------------------------------------------------|-----------------------------------------------|---|----|
| Active elbow extension (normal 180°)                                                                                    | >10° reduction                                | 0 | 0  |
|                                                                                                                         | 1 to 10° reduction                            | 1 | 1  |
|                                                                                                                         | No reduction                                  | 2 | 2  |
| Active supination in extension<br>(Elbow extended, forearm supinates)<br>Mid-position: palm to 90° horizontal           | None                                          | 0 | 0  |
|                                                                                                                         | Under mid-position                            | 1 | 1  |
|                                                                                                                         | To mid-position                               | 2 | 2  |
|                                                                                                                         | Past mid-position                             | 3 | 3  |
| Active supination in flexion<br>(elbow flexed at 90° forearm supinates)                                                 | None                                          | 0 | 0  |
|                                                                                                                         | Under mid-position                            | 1 | 1  |
|                                                                                                                         | To mid-position                               | 2 | 2  |
| Active wrist dorsiflexion<br>(forearm supported, active dorsiflexion of wrist)<br>Mid-position: palm level with forearm | Past mid-position                             | 3 | 3  |
|                                                                                                                         | Wrist ulnar deviation                         | 0 | 0  |
|                                                                                                                         | Wrist radial deviation                        | 1 | 1  |
|                                                                                                                         | Neutral                                       | 2 | 2  |
| Wrist dorsiflexion<br>(angle of movement)                                                                               | Only wrist flexion                            | 0 | 0  |
|                                                                                                                         | With wrist in neutral position                | 1 | 1  |
|                                                                                                                         | With wrist dorsiflexion                       | 2 | 2  |
| Finger opening                                                                                                          | Within palm                                   | 0 | 0  |
|                                                                                                                         | Pressed laterally against index finger        | 1 | 1  |
|                                                                                                                         | Partly assist in grasp                        | 2 | 2  |
|                                                                                                                         | Thumb finger grasp possible                   | 3 | 3  |
|                                                                                                                         | Active abduction                              | 4 | 4  |
| Thumb in function                                                                                                       | In all manipulative functions                 | 0 | 0  |
|                                                                                                                         | Only with fine motor manipulation             | 1 | 1  |
|                                                                                                                         | Only with walking or running                  | 2 | 2  |
|                                                                                                                         | None                                          | 3 | 3  |
| Associated increase in muscle tone                                                                                      | None                                          |   | 0  |
|                                                                                                                         | Poor, no use of hidden function               |   | 1  |
|                                                                                                                         | Use of all functions, but limited in ADLs     |   | 2  |
|                                                                                                                         | Use of all functions, but not limited in ADLs |   | 3  |
| Two handed function                                                                                                     |                                               |   |    |
| Total score                                                                                                             |                                               |   | 47 |

ADL, activity of daily living.

Adapted from Graham HK, et al. Gait Posture 2000;11:67-79.<sup>2</sup>
